# Supplementary material for: Crucial Involvement of Heme Biosynthesis in Vegetative Growth, Development, Stress Response, and Fungicide Sensitivity of Fusarium graminearum
Source: MDPI journal article supplement (doi:10.3390/ijms25105268), 2024-05-12
Supplement: s1 [file s1]

Table S1 Primers used in this study

| Primer names  | Sequence (5'-3')                                               | Annotation                                                  |
|---------------|----------------------------------------------------------------|-------------------------------------------------------------|
| FgCPO-UF      | TGCTTGTAAGTGCCGTATTG                                           | Primers to amplify FgCPO upstream fragment                  |
| FgCPO-UR      | AGCCAGCCAACAGCTCCCTC<br>ATCGCAGTCGCATGGG                       |                                                             |
| FgCPO-DF      | CGCAAACCGCCTCTCCCCAA<br>GCCATTAATAACTTTC                       | Primers to amplify FgCPO downstream fragment                |
| FgCPO-DR      | CATCACAGCCTTCCACGA                                             |                                                             |
| FgCPO-NF      | TCAGGCTGCTTCAGTAAAT                                            | Nested primers to amplify the FgCPO vector                  |
| FgCPO-NR      | AAGCCAAGGAAGGTGGTGA<br>GA                                      |                                                             |
| HPH-F         | GGGAGCTGTTGGCTGGCT                                             | Primers to amplify the fragment of hygromycin               |
| HPH-R         | GGGGAGAGGCGGTTTGCG                                             |                                                             |
| Y-FgCPO-F     | CCGTAAGGACGAGTGGGA                                             | Verification of FgCPO fragment                              |
| Y-FgCPO-R     | CGATGATGGGAATGTAGGAG                                           |                                                             |
| Y-CPOUF       | TACATACGGGAATACGAT                                             | Verification of FgCPO upstream binding region               |
| Y-CPOUR       | AGGGCAAAGGAATAGA                                               |                                                             |
| Y-CPODF       | CCGCCGCTACTGCTACAA                                             | Verification of FgCPO downstream binding region             |
| Y-CPODR       | CAACCACCGCACGAACAT                                             |                                                             |
| Pro-CPO-F     | AGCCTTGTGATAATGGAGA                                            | Probe for Southern blot verification of $\Delta Fgcpo$      |
| Pro-CPO-R     | GAGATGAACGATGTAGCG<br>GTAGGAACCCAATCTTCAAA                     |                                                             |
| GFP-F         | ATGGTGAGCAAGGGCGAG                                             | Primers to amplify the full length of GFP                   |
| GFP-R         | CTTGTACAGCTCGTCCATG<br>TTTCGTAGGAACCCAATCTTC                   |                                                             |
| GFP-FgCPO-F   | AAAATGGCTGCCAGACAGCC<br>AGC                                    | Primers to amplify the full length of FgCpo for GFP-labeled |
| GFP-FgCPO--R  | CACCACCCCGGTGAACAGCT<br>CCTCGCCCTTGCTCACGACCC<br>ACTCCTTGGGATC |                                                             |
| Y-GFP-FgCPO-F | CAGTGCTTCAGCCGCTAC                                             | Verification of GFP-FgCPO vector                            |
| Y-GFP-FgCO-R  | TCTTGAGAACGCAGGTC                                              |                                                             |
| FgFCUF        | TCTGGTAATGGGAAATAGG                                            | Primers to amplify FgFC upstream fragment                   |
| FgFCUR        | AGCCAGCCAACAGCTCCCTT<br>GAAAGTGGTGGGAAAG                       |                                                             |
| FgFCDF        | CGCAAACCGCCTCTCCCCTC<br>ATACCTTTACGGGAGA                       | Primers to amplify FgFC downstream fragment                 |
| FgFCDR        | AGTTGCCATCGTGCTA                                               |                                                             |
| FgFCNF        | ATTTGCCGCTTTGGTC                                               | Nested primers to amplify the FgFC vector                   |
| FgFCNR        | TGTTTCCTTGGTGGGT                                               |                                                             |
| Y-FgFC-F      | GCTCAAAGGCGGTATCTG                                             | Verification of FgFC fragment                               |

| Primer names | Sequence (5'-3')      | Annotation                                                 |
|--------------|-----------------------|------------------------------------------------------------|
| Y-FgFC-R     | TCGGTAAGGGTTGGAAAA    |                                                            |
| YZ-FgFCUF    | ATTGTGGCGGGAATA       | Verification of FgFC upstream binding region               |
| YZ-FgFCUR    | AGGGCAAAGGAATAGA      |                                                            |
| YZ-FgFCDF    | CGCTCGTCTGGCTAAG      | Verification of FgFC downstream binding region             |
| YZ-FgFCDR    | ATTGTGGCGGGAATA       |                                                            |
| Pro-FC-F     | CTCGGCTGTCGCCTGATT    | Probe for Southern blot verification of $\Delta Fgc$       |
| Pro-FC-R     | CACCTAGCTCGCGTTTGC    |                                                            |
| FgFCGFP-F    | GCGAATTGGGTACTCAAATT  |                                                            |
|              | GGTTATGGCTTCGAGAATAT  |                                                            |
|              | CTAC                  | Primers to amplify the full length of FgFC for GFP-labeled |
| FgFCGFP-R    | CAGCTCCTCGCCCTTGCTCAC |                                                            |
|              | TTACGCTAGGCCAGCCTGCTG |                                                            |
| Y-GFP-FgFC-F | AGCAGAAGAACGGCATCA    | Verification of GFP-FgFC vector                            |
| Y-GFP-FgFC-R | TCGGTAAGGGTTGGAAAA    |                                                            |
| Q-FgCYP51AF  | CTTCTCCAGAACGTCGTCAA  | Quantitative primers of FgCYP51A                           |
| Q-FgCYP51AR  | CTTCAGTGTCAACCTCCTCC  |                                                            |
| Q-FgCYP51BF  | TGCTCCTATCCACTCCA     | Quantitative primers of FgCYP51B                           |
| Q-FgCYP51BR  | GCTGAACCCTTGCTGAC     |                                                            |
| Q-FgCYP51CF  | ATCGTCCACCCGTTGTAT    | Quantitative primers of FgCYP51C                           |
| Q-FgCYP51CR  | GCAGTCGCCGTATTTATCT   |                                                            |
| Q-FgSSK2F    | AGGAGACGGCGACTGA      | Quantitative primers of -FgHOG1                            |
| Q-FgSSK2R    | TCGGGTGGGAATGAAA      |                                                            |
| Q-FgPBS2F    | CTGGGCAAGGGAAACTAC    | Quantitative primers of -FgHOG1                            |
| Q-FgPBS2R    | ACTGGTGAAGGGTCTGATT   |                                                            |
| Q-FgHOG1F    | CCATCGCCAGTGAGAACA    | Quantitative primers of -FgHOG1                            |
| Q-FgHOG1R    | TAGGGAGAAAGGTAGTCGTG  |                                                            |
| Q-GAPDH-F    | GGGTGACCTCAAGGGTGTTC  | Quantitative primers of GAPDH                              |
| Q-GAPDH-R    | AGTAACCCCACTCGTTGTCG  |                                                            |
